1 **Confounder-adjusted MRI-based predictors of multiple sclerosis disability**

2 Yujin Kim, B.S.<sup>1</sup>, Mihael Varosanec, M.D.<sup>1</sup>, Peter Kosa, Ph.D.<sup>1</sup>, Bibiana Bielekova, M.D.<sup>1\*</sup>.

3

4 <sup>1</sup>National Institutes of Health, National Institute of Allergy and Infectious Diseases, Laboratory  
5 of Clinical Immunology and Microbiology, Neuroimmunological Diseases Section, Bethesda,  
6 MD, 20892, USA

7

8 \* Correspondence: Bibiana Bielekova, Neuroimmunological Diseases Section (NDS), National  
9 Institute of Allergy and Infectious Diseases (NIAID), National Institutes of Health (NIH),  
10 Building 10, Room 5N248D, Bethesda, Maryland 20892. E-mail: [bibi.bielekova@nih.gov](mailto:bibi.bielekova@nih.gov)

11 **ABSTRACT**

12 **Introduction:** Both aging and multiple sclerosis (MS) cause central nervous system (CNS)  
13 atrophy. Excess brain atrophy in MS has been interpreted as accelerated aging. Current paper  
14 tests an alternative hypothesis: MS causes CNS atrophy by mechanism(s) different from  
15 physiological aging. Thus, subtracting effects of physiological confounders on CNS structures  
16 would isolate MS-specific effects.

17 **Methods:** Standardized brain MRI and neurological examination were acquired prospectively in  
18 649 participants enrolled in ClinicalTrials.gov Identifier: NCT00794352 protocol. CNS volumes  
19 were measured retrospectively, by automated Lesion-TOADS algorithm and by Spinal Cord  
20 Toolbox, in a blinded fashion. Physiological confounders identified in 80 healthy volunteers  
21 were regressed out by stepwise multiple linear regression. MS specificity of confounder-adjusted  
22 MRI features was assessed in non-MS cohort (n=160). MS patients were randomly split into  
23 training (n=277) and validation (n=132) cohorts. Gradient boosting machine (GBM) models  
24 were generated in MS training cohort from unadjusted and confounder-adjusted CNS volumes  
25 against four disability scales.

26 **Results:** Confounder adjustment highlighted MS-specific progressive loss of CNS white matter.  
27 GBM model performance decreased substantially from training to cross-validation, to  
28 independent validation cohorts, but all models predicted cognitive and physical disability with  
29 low p-values and effect sizes that outperforms published literature based on recent meta-analysis.  
30 Models built from confounder-adjusted MRI predictors outperformed models from unadjusted  
31 predictors in the validation cohort.

32 **Conclusion:** GBM models from confounder-adjusted volumetric MRI features reflect MS-  
33 specific CNS injury, and due to stronger correlation with clinical outcomes compared to brain  
34 atrophy these models should be explored in future MS clinical trials.

35

### 36 **Keywords**

37 Magnetic resonance imaging, physiological confounders, multiple sclerosis, disability outcomes,  
38 machine learning, gradient boosting machine

39

### 40 **Highlights**

- 41 • Regressing out physiological confounders affecting volume of CNS structures in healthy  
42 volunteers, strengthened correlations between white matter volumes and disability  
43 outcomes in MS cohorts
- 44 • Aggregating volumetric features into generalized boosting machine (GBM) models  
45 outperformed correlations of individual MRI biomarkers with clinical outcomes in MS
- 46 • Developed more sensitive and reliable models that predict MS-associated disability
- 47 • Independent validation cohorts show true model performances
- 48 • Developed GBM models should be explored in future MS clinical trials

49

### 50 **Data Availability**

51 All raw data and script used for all analyses will be provided after being accepted.

52

### 53 **Author Contribution**

54 YK and MV performed MRI scan processing, volumetric analyses, and maintained the cloud  
55 based QMENTA platform to generate brain volumetric data. YK performed all analyses detailed  
56 in the paper, generated the figures, and contributed to writing the paper. PK exported all clinical  
57 scores used in correlation analyses and supervised in the development of GBM models. BB  
58 construed the project conceptually, guided and supervised all aspects of the study, and  
59 contributed to the writing of the paper and figure creations. All authors critically reviewed and  
60 edited the manuscript.

61

## 62 **Acknowledgements**

63 We are grateful for all study participants as well as everyone in the Clinical Immunology and  
64 Microbiology (LCIM) for their support and feedbacks.

65

## 66 **Funding**

67 The research was supported by the Intramural Research Program of the National Institute of  
68 Allergy and Infectious Diseases (NIAID), National Institutes of Health (NIH).

69

## 70 **Conflict of Interest**

71 The authors declare no conflict of interest.

## 72 **1. INTRODUCTION**

73 Scientific advancements in Multiple Sclerosis (MS) translated into the development of disease-  
74 modifying treatments (DMTs) that effectively inhibit central nervous system (CNS) tissue  
75 destruction and clinical disability development if given to a young subject shortly after disease  
76 onset. Unfortunately, these treatments lose efficacy with advancing age of patients. On a group  
77 level, they show no statistically-significant inhibition of disability progression in subjects older  
78 than 54 years (Weideman et al., 2017b). To develop more effective MS treatments, we need  
79 sensitive outcomes that can objectively quantify CNS tissue destruction and development of  
80 disability against active comparator, in reasonably sized cohorts.

81

82 Magnetic resonance imaging (MRI) volumetric outcomes such as brain atrophy, have been  
83 successfully used in Phase II and Phase III MS clinical trials (Hemond and Bakshi, 2018; Jacobs  
84 et al., 2021; Zeydan and Kantarci, 2020). However, is brain atrophy the most sensitive and the  
85 most specific imaging outcome in MS?

86

87 In terms of sensitivity, there is mounting evidence that atrophy of deep gray matter (GM)  
88 structures, especially thalamus (Amin and Ontaneda, 2021), or enlargement of ventricles  
89 (Jakimovski et al., 2020) may exert larger effect sizes in MS than whole brain atrophy.

90 Additionally, assembling several of these changing brain volumes into a single model using  
91 machine-learning (ML) algorithm(s) may further increase effect size.

92

93 In terms of specificity, brain atrophy also occurs during natural aging (Rocca et al., 2017). In  
94 what we identified as the largest published study of healthy volunteers (HV; n=2790),

95 physiological confounders such as age, gender and predicted intracranial volume (PIV),  
96 explained a very high proportion of variance in thalamic (>60%), caudate (>40%) and  
97 ventricular (57%) volumes (Potvin et al., 2016). In fact, ML-derived models can predict  
98 chronological age (with a mean absolute error of +/-5 years (Cole et al., 2017)) using just brain  
99 MRI predictors. A study from European Magnetic Resonance Imaging in MS (MAGNIMS)  
100 consortium (Cole et al., 2020) explored the difference between chronological and brain MRI-  
101 predicted age, termed as Brain-predicted Age Difference (Brain-PAD). The study demonstrated  
102 that 1204 MS patients had on average 6 years higher Brain-PAD compared to HV, without  
103 significant differences among MS subtypes (i.e., relapsing-remitting [RRMS], secondary-  
104 [SPMS] and primary-progressive MS [PPMS]). Brain-PAD also correlated with disability  
105 measured by Expanded Disability Status Scale (EDSS). Although no effect size was provided,  
106 the associated figures suggested that Brain-PAD explains < 10% of EDSS variance. The authors  
107 concluded that MS is associated with accelerated brain aging (Cole et al., 2020).

108  
109 It could be alternatively interpreted that MS and natural aging destroy structurally overlapping  
110 CNS areas, but MS does so by different pathophysiological processes. This interpretation may  
111 explain why treated MS patients had significantly higher Brain-PAD compared to untreated MS  
112 patients (Cole et al., 2020). If MS causes accelerated brain aging and MS DMTs inhibit MS-  
113 associated CNS damage, then treated MS patients should have decreased Brain-PAD, not  
114 increased. On the other hand, if MS and natural aging cause CNS damage by different  
115 mechanisms, then MS DMTs may have none, or even paradoxical effect(s) on Brain-PAD. Our  
116 previous study demonstrated that CSF biomarkers also predict chronological age in HV with  
117 high accuracy. When we applied this model to MS patients, we saw no significant differences in

118 age-predictions between HV and MS (Barbour et al., 2020). These data strongly support this  
119 alternative interpretation, in which (molecular) mechanisms of aging and MS progression are  
120 mostly different.

121  
122 Further extension of this interpretation is the hypothesis that aging process and other  
123 physiological confounders reflected on volumetric brain MRI represent “noise” when trying to  
124 understand (and treat) MS-specific processes. Here, we examine this hypothesis by addressing  
125 the following aims: (1) To adjust volumes of the CNS structures for physiological confounders  
126 identified from internal HV cohort to understand effects of MS on CNS structures; (2) To  
127 examine, whether confounder-adjusted MRI predictors can be assembled into computational  
128 models that predict clinical disability in the independent validation cohort, and whether such  
129 validated model exerts larger effect size(s) than any single MRI biomarker; (3) To investigate  
130 whether computational model(s) derived from confounder-adjusted MRI predictors outperform  
131 models(s) from raw MRI volumes in predicting clinical disability outcomes.

132

## 133 **2. MATERIAL AND METHODS**

134 The study design is shown in Figure 1.

135

### 136 **2.1 Cohort characteristics**

137 All patients were prospectively recruited into the protocol “Comprehensive Multimodal Analysis  
138 of Neuroimmunological Diseases of the Central Nervous System” (Clinicaltrials.gov Identifier:  
139 NCT00794352) and provided written informed consent. The inclusion criteria for patient cohort  
140 are age at least 12 years and clinical symptoms, CSF results or MRI imaging suggestive of

141 neuroimmunological disease. Approximately 60% of enrolled patients eventually fulfill  
142 contemporary version of MS diagnostic criteria (with all 3 MS subtypes represented), while 20%  
143 have other inflammatory neurological diseases (OIND) and 20% have non-inflammatory  
144 neurological diseases (NIND). The HV inclusion criteria are age at least 18 years, absence of  
145 known diseases and conditions that could affect CNS and normal vital signs at the screening  
146 visit. The protocol was approved by the Combined Neuroscience Institutional Review Board of  
147 the National Institutes of Health. Patient demographics and other clinical characteristics are  
148 provided in Supplementary Figure S1.

149  
150 All subjects (n=649) with brain MRI images that passed quality control (see below) and had  
151 matched clinical outcomes were included. Neurological exams documented in structured  
152 electronic medical record note were either transcribed (before 2017) or directly documented  
153 (after 2017) into the NeurEx<sup>TM</sup> App (Kosa et al., 2018) by clinicians with MS specialization. The  
154 NeurEx<sup>TM</sup> App automatically computes MS disability scales including EDSS (Kurtzke, 1983)  
155 (ordinal scale from 0-10) and NeurEx (continuous scale from 0 to theoretical maximum of 1349).

156  
157 Functional tests (i.e., timed 25 foot walk and 9 hole peg test) are required for computing of  
158 Combinatorial weight-adjusted disability score (CombiWISE; continuous scale from 0-100)  
159 (Weideman et al., 2017a), and Symbol Digit Modalities Test (SDMT) (Benedict et al., 2017).  
160 These were acquired by investigators blinded to clinician-derived disability scales and were  
161 recorded into research database.

162

## 163 **2.2 Volumetric Analysis**



164 Investigators involved in MRI analysis were blinded to clinical outcomes and diagnostic  
165 categories. MRIs were performed on two scanners: Signa (3TA, General Electric, Milwaukee,  
166 WI) using 16-channel head coil and Skyra (3TD, Siemens, Malvern, PA) using 32-channel head  
167 coil. Sequences included 3D-MPRAGE (TR, 3000 ms; TE, 3 ms; TI, 900 ms; FA 8°; 1-mm  
168 isotropic resolution, TA 6 min), 3D-FLAIR (TR, 4800 ms; TE, 354 ms; TI, 1800 ms; 1-mm  
169 isotropic resolution; acquisition time, 7 min), and PD/T2 (TR, 3540 ms; TE, 13 and 90 ms; 0.8-  
170 mm in-plane resolution; slice thickness, 2 mm; acquisition time, 4 min) on 3TD and 3D-FSPGR-  
171 BRAVO (TR, 1760 ms; TE, 3 ms; TI, 450 ms; FA 13°; 1-mm isotropic resolution; acquisition  
172 time, 5 min), 3D-FLAIR-CUBE (TR, 6000 ms; TE, 154 ms; TI, 1800 ms; 1-mm isotropic  
173 resolution; acquisition time, 9 min), and PD/T2 (TR, 5325 ms; TE, 20 and 120 ms; 1-mm in-  
174 plane resolution; slice thickness, 3 mm; acquisition time 4 min) on 3TA. Sagittal and axial cuts  
175 extended distally to C5 level, allowing determination of semi-qMRI biomarkers of  
176 medulla/upper spinal cord (SC) atrophy using SC Toolbox (De Leener et al., 2017).

177  
178 After pre-processing steps (1. De-identification, 2. DICOM to NIFTI transformation, 3. Skull  
179 stripping; and 4. Alignment), images were uploaded to commercial cloud-based imaging  
180 platform QMENTA (<https://www.qmenta.com/>) which, in collaboration, implemented the  
181 published Lesion-TOADS (Shiee et al., 2010) algorithm. Lesion-TOADS combines a topological  
182 and statistical likelihood atlas for computation of 12 CNS volumetric biomarkers: Cerebral white  
183 matter (WM), Cerebellar WM, Brainstem, Putamen, Thalamus, Caudate, Cortical gray matter  
184 (GM), Cerebellar GM, Lesion Volume, Ventricular CSF and Sulcal CSF. Average cross-  
185 sectional area (CSA) of the upper cervical SC at C1-C2 level was calculated using SC Toolbox  
186 from 3D MPRAGE brain MRI images.

187

188 Before unblinding, we performed quality control of volumetric data. A total of 62 (8.7%) MRI  
189 scans was excluded due to inaccurate segmentation of brain structures, low image quality, and  
190 motion artifacts, leaving 649 scans for the final dataset in study.

191

192 After unblinding diagnostic categories, MS patients were randomly split into training and  
193 validation cohort (2:1 ratio) with equal proportion in gender and MS subtypes.

194

### 195 **2.3 Adjusting MRI biomarkers for healthy volunteers (HV) confounders**

196 Using only the HV cohort (n=80), MRI volumes were adjusted for age, age<sup>2</sup>, body mass index  
197 (BMI), height, gender, and supratentorial intracranial volume using stepwise multiple linear  
198 regression. Final linear regression models were applied to all subjects to regress out  
199 physiological confounders. The example of confounder adjustments for ventricular volume is  
200 shown in Figure 2. Supplementary information contains analogous data for all remaining MRI  
201 biomarkers.

202

203 The correlation between the confounders and individual structural volumes, before and after co-  
204 variate adjustments, was evaluated using linear regression models in R Studio, reporting a  
205 coefficient of determination ( $R^2$ ; the proportion of variance explained [ranging from 0 to 1] by  
206 the linear model, where higher number signifies closer fit of experimental data points to the  
207 linear regression line of the model), slope, and HV 95% confidence interval.

208

209 Differences between HV and MS cohorts in unadjusted and confounder-adjusted MRI  
210 biomarkers were analyzed using unpaired two-samples Wilcoxon signed-rank test in R (Team,  
211 1969).

212

#### 213 **2.4 Gradient Boosting Machine (GBM) Modeling in the MS training cohort**

214 Unadjusted or confounder-adjusted MRI biomarkers that showed statistically significant  
215 difference between MS and HV in univariate analyses were used as predictors to model four  
216 clinical outcomes: CombiWISE, EDSS, NeurEx, and SDMT. We selected a tree-based  
217 supervised ML algorithm because we considered that MRI features may have non-linear effects  
218 and patients may exert heterogeneity in which brain/SC structures are most affected by the  
219 disease. Among tree-based algorithms, we selected GBM over Random Forest. While GBM is  
220 more difficult to optimize (if using large number of predictors), it is believed to generally  
221 outperform Random Forest. GBM builds trees sequentially, where each successive tree is built  
222 using residuals from the previous tree's predictions. The predictions are iteratively updated by  
223 adding the current tree's prediction (times a shrinkage parameter) to the previous tree's  
224 prediction. For each tree constructed, an out-of-bag (OOB) sample containing half of the  
225 observations is withheld from the training cohort to introduce randomness into the modeling  
226 process. Main GBM tuning parameters are the depth of the individual trees (interaction depth),  
227 the shrinkage parameter (learning rate), the minimum number of observations in trees' terminal  
228 nodes, and the number of trees. Using the *gbm* R package (Greenwell et al., 2020), we selected  
229 an interaction depth of 6, nodes of 5, a shrinkage parameter of 0.01, and used a 10-fold cross  
230 validation to select the optimal number of trees that will prevent each model from overfitting.  
231 Improvement in mean squared error from splits within each individual tree and the average of

232 these improvements across all trees in the ensemble calculated the relative influence of each  
233 variable in a model.

234

235 Each clinical scale was modelled separately since each assesses different attributes of the  
236 neurological spectrum (e.g., SDMT measures reaction time reflective of cognitive disability  
237 whereas other three scales reflect predominantly physical disabilities). The models were  
238 optimized by observing the lowest root mean squared error in the combination of feature  
239 selections within the MS training cohort.

240

## 241 **2.5 GBM model validation**

242 With the final optimized models, two validations methods were performed: (1) 10-fold cross-  
243 validation and (2) an independent cohort validation. 10-fold cross-validation reuses the training  
244 cohort data by randomly partitioning the data into an “internal” training set (90% of the total  
245 training cohort) and validation set (10% of the total training cohort) on different iterations. The  
246 model then tests prediction accuracy of the withheld samples. However, the independent cohort  
247 validation strategy utilizes a completely new dataset that was removed before model  
248 development. This allows true evaluation of the models’ performances in predicting clinical  
249 scores.

250

251 Correlations between measured and predicted clinical scores were evaluated using linear  
252 regression models in R Studio version 4.1.0 (Team, 2015; Team, 2021), reporting  $R^2$ ,  
253 Spearman Rho (the relationship strength of the predicted and measured scores) from R CRAN  
254 Package: stats (Team, 1969) and rstatix (Kassambara, 2021); and Concordance Correlation

255 Coefficient (CCC; the degree of reliability in the method when comparing two measurements of  
256 the same variable) from R CRAN Package: DescTools (Signorell et al., 2021).

257

258 Additional materials and methods are included as Supplemental text.

259

## 260 **3. RESULTS**

### 261 **3.1 Regressing out physiological confounders**

262 We regressed out effects of physiological confounders based on internal HV cohort as described  
263 in Methods and exemplified in Figure 2. For ventricular CSF volume, the multiple linear  
264 regression model selected only effects of age<sup>2</sup> and intracranial volume from the 6 tested  
265 confounders. For some other CNS structures, the multiple linear regression models were more  
266 complex. But consistent with published studies, we saw no independent effects of BMI on any  
267 CNS volume.

268

### 269 **3.2 MS-specific residual effects of age and gender on CNS volumes**

270 Several remaining confounding effects on GM volumes were noted in MS cohort. All GM  
271 structures demonstrated same paradoxical trend of increasing GM volumes with age of MS  
272 patients. This relationship reached statistical significance (i.e., Bonferroni adjusted  $p < 0.004$ ) for  
273 caudate ( $R^2 = 0.04$ ,  $p = 0.002$ ; Supplementary Figure S2A), cerebrum GM ( $R^2 = 0.06$ ,  $p < 0.001$ ,  
274 Supplementary Figure S2B), putamen ( $R^2 = 0.08$ ,  $p < 0.001$ ; Supplementary Figure S2C) and  
275 supratentorial GM ( $R^2 = 0.06$ ,  $p < 0.001$ , Supplementary Figure S2D). Since these residual effects  
276 were not seen in non-MS cohort (Supplementary Figure S2), they are MS-specific and are driven  
277 by non-physiologically low GM volumes in young patients. Although the unadjusted volumes of

278 these GM structures decrease with age (consistent with other longitudinal studies), the  
279 paradoxical positive residual effect of age in MS emerges after subtracting physiological  
280 confounders because the slope of age-related decrease is higher in HV and non-MS cohorts.

281  
282 In contrast to GM where younger MS patients exhibited more profound non-physiological  
283 atrophy compared to older MS patients, we observed residual linear loss of supratentorial WM  
284 ( $R^2=0.10$ ;  $p<0.001$ ; Supplementary Figure S3B) and normal appearing WM ( $R^2=0.09$ ;  
285  $p<0.001$ ; Supplementary Figure S3A) with MS aging, paralleled by significant residual increase  
286 in ventricular (but not sulcal) CSF volume ( $R^2=0.04$ ;  $p=0.002$ , Supplementary Figure S4B).

287 This progressive non-physiological WM loss was MS specific (i.e., it was not observed in non-  
288 MS cohort) and affected also the cerebellum WM even though the residual correlation of  
289 cerebellum WM with age in MS became non-significant after Bonferroni adjustment. In fact, the  
290 large non-MS cohort ( $n=160$ ) behaved identically to HV regarding all WM volumes, while it  
291 exhibited non-physiological atrophy in some GM structures (including thalamus, Supplementary  
292 Figure S4A) and non-physiological increase in ventricular volume (Supplementary Figure S4B).

293  
294 We conclude that subtracting effects of physiological confounders on volumes of CNS structures  
295 identified non-physiological loss of GM volumes in young MS patients and MS specific,  
296 progressive non-physiological loss of WM volumes.

297  
298 **3.3 Differences in unadjusted and confounder-adjusted MRI features between HV and MS**

299 As shown in Supplementary Figure S1, HV cohort was significantly younger than MS (i.e.,  
300 Median 40.4 years vs Median=52.4 years;  $p=1.24e-7$ ). Because age exerted significant effects on

301 many CNS volumes, subtracting the variance explained by age diminished differences between  
302 HV and MS cohorts in most CNS volumetric biomarkers (Figure 3). The greatest decrease in  
303 effect size was seen for thalamus, caudate and brain parenchymal fraction (BPFR) - consistent  
304 with the reported strong effect of physiological aging on these CNS structures.

305  
306 Unexpectedly, we observed increase in effect sizes of WM volumes on differentiating MS from  
307 HV after confounder adjustment: Supratentorial WM and normal appearing WM (which are  
308 highly correlated – see Figure 4) but marginally also cerebellum WM.

309  
310 Confounder adjustment affected correlations between MRI features (Figure 4). As expected, it  
311 eliminated correlations of MRI biomarkers with age in the HV cohort. But the adjustment also  
312 enhanced correlations of BPFR with most brain volumes in both HV and MS cohorts. Finally,  
313 confounder adjustments strengthened correlations of brain WM volumes and ventricular CSF  
314 with remaining MRI features in MS.

315

### 316 **3.4 Univariate correlations of MRI features with clinical outcomes**

317 Figure 5 and Supplementary Table S1 show univariate Spearman correlation coefficients and p-  
318 values of unadjusted and HV confounder-adjusted MRI volumes with clinical outcomes in the  
319 MS training and validation cohorts. We observed that for physical disability outcomes (EDSS,  
320 CombiWISE and NeurEx), age exerted comparable or higher effect size on clinical outcomes  
321 than the strongest MRI biomarkers. This was not true for SDMT, where brain lesion volume and  
322 ventricular CSF had strongest correlations.

323

324 As would be expected from strong univariate correlations of age with disability outcomes and  
325 with MRI volumes, subtracting age effects significantly diminished correlations of CSF volumes,  
326 GM volumes and even BPFr with clinical outcomes.

327  
328 However, confounder adjustment strengthened correlation of WM volumes with all clinical  
329 outcomes (in both cohorts). In fact, WM volumes became the highest correlated MRI biomarkers  
330 with physical disability outcomes (NeurEx and CombiWISE) and NAWM became the second  
331 highest (after lesion volume) correlating biomarker with SDMT in the validation cohort after  
332 confounder adjustment.

333  
334 We conclude that adjustment for physiological confounders reproducibly strengthened  
335 correlations of supratentorial WM volumes with MS clinical outcomes.

336  
337 **3.5 Models from MRI volumetric data adjusted for physiological confounders achieve**  
338 **stronger effect sizes in predicting MS clinical outcomes in the independent validation**  
339 **cohort**

340 Unadjusted and confounder-adjusted MRI features that achieved statistical significance in  
341 differentiating HV and MS cohorts were inputted into ML-based models of four clinical  
342 outcomes. Because age and gender exerted significant influence on clinical outcomes and their  
343 effects were subtracted from confounder-adjusted MRI volumes, we added these demographic  
344 variables into the model that used adjusted MRI volumes. The full statistical results from all  
345 models are in Supplementary Table S2.



346 For the three outcomes of physical disability (i.e., CombiWISE, EDSS and NeurEx), we  
347 observed stronger effect sizes for unadjusted models (Figure 6A and Supplementary Table S2).  
348 But for SDMT, the confounder-adjusted model slightly outperformed the unadjusted model.  
349  
350 This hierarchy between models was generally preserved in the training cohort 10-fold cross-  
351 validation results, shown in Figure 6A as violin plots with medians marked by red cross-  
352 sectional line. Cross-validation have broad distribution of effect sizes in comparison to the full  
353 training cohort: e.g., while training cohort Spearman correlation coefficients ( $Rho$ ) were higher  
354 than 0.75 for all eight models, cross-validation results ranged from  $Rho$  0.2 to  $Rho$  0.8,  
355 showcasing the poor estimate of model's performance depending on the training cohort splits.  
356 Nevertheless, cross-validation medians had uniformly lower effect sizes than the training cohort;  
357 the decrease in effect sizes was substantial (between 40-60% for  $R^2$ ).  
358  
359 The independent validation cohort achieved effect sizes consistently below the cross-validation  
360 medians, showcasing that the training cohort, including training cohort cross-validation,  
361 significantly over-estimate models' performance. Nevertheless, all eight models validated with  
362 very low p-values (all below  $9E-8$ ; Supplementary Table S2).  
363  
364 The most surprising observation was that confounder-adjusted models consistently outperformed  
365 models from unadjusted features in the independent validation cohort. The absolute difference in  
366  $R^2$  values between unadjusted and adjusted models was up to  $R^2=0.08$  (i.e., EDSS unadjusted  
367 model achieved  $R^2=0.18$ , while adjusted model had  $R^2=0.26$ ; Supplementary Table S2). This  
368 represents relative improvement of 30%.

369

370 We conclude that training cohort results are poor predictors of the model's performance in the  
371 independent validation cohort: they consistently and dramatically over-estimate final effect sizes.  
372 The stronger validation performance of confounder-adjusted models supports our hypothesis that  
373 effects of aging and other physiological covariates on MRI volumes represents noise when  
374 predicting which MS-related CNS tissue damage contributes to clinical disability.

375

376 This does not indicate that age does not play role in MS. In fact, age was selected as the strongest  
377 feature in all confounder-adjusted models (Figure 6B), implying that age is the most important  
378 determinant of MS-related disability. Our results simply support the hypothesis that age exerts  
379 effects on CNS structures by (mostly) different mechanisms in physiological aging and in MS.  
380 By separating the effect of age on MS from its effect on brain structures during natural aging, we  
381 built more reliable models that predict MS-associated disability with higher effect sizes in the  
382 independent validation cohort.

383

#### 384 **4. DISCUSSION**

385 The goal of this project was to gain understanding of MS-driven volumetric MRI changes and to  
386 examine if computational models of confounder-adjusted MRI volumes reproducibly predict  
387 different clinical outcomes.

388

389 Before we discuss our findings, we want to point out following limitations: our HV cohort is  
390 relatively small and the Lesion-TOADS automated segmentation algorithm, implemented from  
391 the inception of our natural history protocol, has relatively narrow adoption. Despite the

392 differences in cohort sizes and the segmentation algorithms, our observations are aligned with  
393 published literature, both for HV (Potvin et al., 2016) and MS (Ontaneda et al., 2021; Simpson-  
394 Yap et al., 2021). Specifically, although we tested six confounders, only age (and age<sup>2</sup>), gender  
395 and total intracranial volume influenced volumetric brain MRI features with effect sizes  
396 comparable to those reported by others (Potvin et al., 2016). Second, we did not examine the  
397 interaction between confounders because others (Potvin et al., 2016) found that these had  
398 negligible effects. To facilitate broader use and potential external validation of our results, we  
399 collaborated with QMENTA to implement publicly available Lesion-TOADS algorithm on their  
400 platform. The other important limitation is that by the virtue of being national referral center, our  
401 patient population may be skewed towards subject with more aggressive disease. However, this  
402 limitation applies to all MS imaging studies, as these are performed almost uniformly in tertiary  
403 academic centers. Finally, our comparably high effect sizes in predicting MS disability could be,  
404 at least partially due to lower technical variability by virtue of a single center study that uses  
405 standardized scanning protocols. Indeed, MAGNIMS investigators reported that inter-  
406 scanner/protocol confounders may explain >10% of variance (Cole et al., 2020).

407

408 Notwithstanding these limitations, our study achieved its aims. Our GBM models from  
409 confounder-adjusted MRI features predicted four MS disability scales with high statistical  
410 significance and good effect sizes in the independent validation cohort. These models slightly  
411 outperformed analogous models derived from unadjusted MRI features and significantly  
412 outperformed any single MRI biomarker.

413

414 Considering that approximately 50% of variance in brain volumes can be explained by  
415 confounders, subtracting these confounders significantly diminished the difference between MS  
416 and HV cohorts (which differed in age) and decreased univariate correlations with MS clinical  
417 outcomes (which positively correlate with age). Ignoring such large effects of confounders on  
418 MRI volumes overestimates how well the measured change reflects MS progression.

419  
420 Unexpectedly, confounder adjustment increased effect sizes (and lowered p-values) for WM  
421 MRI volumes: for both supratentorial WM and normal appearing WM (which correlate strongly  
422 with each other), but also for cerebellum WM, where the improvement was marginal. The  
423 confounder-adjusted WM volumes had comparable effect size to BPFr in differentiating MS  
424 from HV.

425  
426 We conclude that after subtracting the effects of natural aging and sexual dimorphism, WM  
427 pathology (represented by formation of MS lesions associated with atrophy of deep GM  
428 structures and enlargement of ventricles) is the dominant effect of MS visible on conventional  
429 brain MRI. The resulting correlation matrix of confounder-adjusted MRI volumes supports this  
430 conclusion by demonstrating relatedness of MS-induced changes in all aforementioned  
431 structures. Similarly, we saw that these brain structures were selected by most GBM models,  
432 with predictably higher influence of WM volumes in the models based on confounder-adjusted  
433 biomarkers.

434  
435 Although brain structures with higher effect sizes in differentiating MS from HV were more  
436 important in GBM models of disability, this was not true for SC CSA. C1-2 SC CSA had

437 marginal effect size and p-value in differentiating MS from HV, but it had relatively high  
438 univariate correlations with disability outcomes and, concordantly, was selected by all GBM  
439 models of physical disability (i.e., EDSS, CombiWISE, and NeurEx) as leading MRI feature.  
440 These results are consistent with clinical observations that MS involvement of SC is the  
441 dominant driver of physical disability, especially ambulation. We believe that relatively weak  
442 effect size in differentiating MS from HV for SC CSA resides in the technical difficulty of  
443 scanning such small structure. We did not have dedicated SC MRIs for most subjects, and  
444 artifacts due to CSF pulsation, heart beats and breathing are likely accentuated by using brain  
445 coil, rather than dedicated SC coil with protocol optimized for SC imaging.

446

447 Additionally, age was selected as the strongest variable in confounder-adjusted models. This  
448 poses a question whether we gained anything by adjusting MRI features for confounders. First,  
449 confounder adjustment did enhance validation performance of the models. Second, in unilateral  
450 correlations, age correlates with disability outcomes with effect sizes comparable to strongest  
451 MRI biomarkers. However, this does not mean that effect of age on MS disability is  
452 pathophysiologically identical to normal aging. For example, age effects on immunity may  
453 become relevant only in patients with intrathecal inflammation. Separating age from its  
454 confounding effect on MRI biomarkers may lead to models that are more responsive to MS  
455 treatment effects, a potential hypothesis for future longitudinal studies.

456

457 Thanks to a recent meta-analysis of 302 papers describing models of MS clinical outcomes (Liu  
458 et al., 2022), we can compare our results with other published MRI biomarker-based models.  
459 Using an associated website that allow users to dynamically explore this rich dataset, we

460 identified 40 papers that used MRI biomarkers to model EDSS as ordinal scale and reported p-  
461 values, and 20 papers that reported effect sizes as  $R^2$ . Many studies overestimate effect sizes  
462 from using small cohorts or failing to implement methodological design that limit bias (Button et  
463 al., 2013; Ioannidis, 2005, 2008). Thus, the meta-analysis scored methodological rigor of  
464 reviewed studies by grading 7 criteria: 1. Blinding, 2. Defined strategy to deal with outliers, 3.  
465 Explanation of missingness, 4. Adjustment for confounders, 5. Number of comparisons made  
466 and whether p-values were adjusted, 6. Presence of controls and 7. Validation (cross-validation  
467 of the training cohort versus independent validation cohort). The median numbers of criteria  
468 fulfilled by published studies that modelled EDSS was 2, and the majority studied less than 100  
469 MS patients. Only 38% of studies adjusted p-values for multiple comparisons, and studies that  
470 did not adjust performed up to 500 comparisons. The studies with the highest methodological  
471 rigor and largest cohorts originated from the MAGNIMS consortium. MAGNIMS study of  
472 effects of GM brain volumes on differentiating MS (n=961) from HV (n=203) and on disability  
473 prediction found negative association between deep GM ( $\beta=-0.71$ ;  $p<0.0001$ ) and cortical GM  
474 ( $\beta=-0.22$ ;  $p<0.0001$ ) and EDSS. Unfortunately,  $R^2$  was not reported. For much smaller studies  
475 that reported  $R^2$ , the range was 0.7 to 0.05 in the training cohort. Only one study reported cross-  
476 validation/OOB results (Cordani et al., 2021) and achieved  $R^2=0.19$  (p-value range from  
477  $<0.001$  to 0.04) in RRMS (n=250) and  $R^2=0.16$  (p-value range from 0.02 to 0.04) in PMS  
478 (n=114). Current study fulfills 7/7 criteria of methodological rigor and is the only study that  
479 includes independent validation cohort. For the confounder-adjusted EDSS model, the training  
480 cohort  $R^2$  is 0.69 ( $p=3.8e-43$ ). Median cross-validation  $R^2$  is 0.29 and the independent  
481 validation cohort  $R^2$  is 0.26 ( $p=2.4e-08$ ). To our knowledge, this is the strongest reported effect

482 size for predicting EDSS as ordinal scale from quantitative MRI biomarkers in the literature thus  
483 far.

484  
485 Analogously, we identified 12 studies that used MRI predictors for modeling SDMT. 11/12  
486 reported p-values and 5/12 reported  $R^2$ . The median methodological rigor score was 2/7 and  
487 most cohorts were smaller than 100 subjects (the largest had 151 subjects). Only 16.7% adjusted  
488 for multiple comparisons and the studies that did not adjust p-values performed up to 100  
489 comparisons. No studies reported cross-validation or independent validation. The reported  $R^2$   
490 (for the training cohorts) ranged from 0.62-0.3. Again, our confounder-adjusted SDMT model  
491 achieved  $R^2=0.78$  ( $p=7.3e-75$ ) with independent validation  $R^2=0.34$  ( $p=2.9e-11$ ), which  
492 represent the best performance among published studies.

493  
494 We have observed that cross-validation generates broad range of results that encompass the  
495 effect sizes of the independent validation cohort, but the median of cross-validation results is still  
496 overly optimistic. This is consistent with our extensive observations using independent validation  
497 in all our projects (Boukhvalova et al., 2019; Liu et al., 2022; Masvekar et al., 2021; Messan et  
498 al., 2022; Pham et al., 2021). Therefore, while cross-validation should be included in all  
499 modeling studies, the independent validation must be considered a gold standard. This is  
500 extremely important, as only 15% of published MS models used any validation strategy and only  
501 8% used independent validation.

502  
503 In conclusion, our final models outperform correlations of any single MRI biomarker with  
504 clinical outcomes. These models are therefore likely more sensitive imaging outcomes and

505 should be explored in future clinical trials, especially when targeting older subjects with  
506 progressive MS who no longer form acute MS lesions. The MAGNIMS consortium has available  
507 datasets to quantify possible loss of sensitivity due to inter-scanner/inter-protocol variance on  
508 such ML-based models in comparison to a single MRI biomarker.



509 **FIGURE LEGENDS**

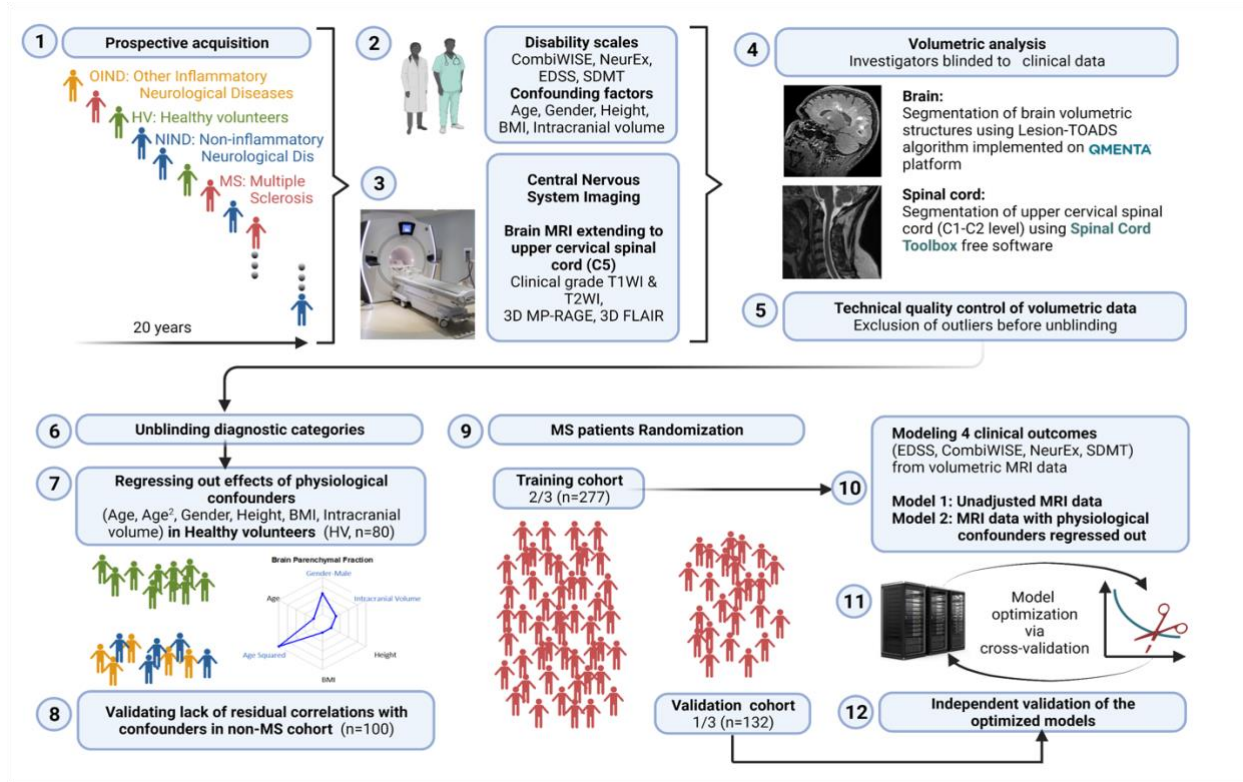

510

511 **Figure 1. Study design. 1:** All subjects participating in a prospective collection of standardized  
 512 clinical and imaging outcomes under a natural history protocol for 20 years were enrolled. **2:** All  
 513 subjects underwent full neurological examination transcribed to the NeurEx™ App that  
 514 automatically calculates clinician-derived disability scales. Additional functional tests, such as  
 515 Symbol Digit Modalities Test (SDMT) and stated confounding factors were collected and  
 516 transcribed to research database. **3:** All subjects underwent research brain MRI that extended  
 517 caudally to the C5 level of the spinal cord (SC). **4:** Anonymized MRIs were uploaded to the  
 518 cloud-based QMENTA platform to derive brain volumetric data using Lesion-TOADS  
 519 algorithm. Upper cervical SC C1-C2 volume was calculated using Spinal Cord Toolbox. **5:**  
 520 Resulting quantitative MRI biomarkers were assessed for quality to identify intra- and inter-  
 521 individual outliers. Identified outliers were manually checked and scans with incorrect

522 segmentation were excluded ( $122/771 = 15.8\%$ ). **6:** Unblinding of diagnostic categories occurred  
523 after exclusion of technical outliers was completed. **7:** We regressed out the effects of six stated  
524 confounders measured in the HV cohort ( $n=80$ ) and applied the same transformation to non-MS  
525 ( $n=100$ ) and MS ( $n=409$ ) cohorts to eliminate effects of physiological confounders on MRI  
526 volumes. **8:** We validated lack of residual correlations with the confounding factors in non-MS  
527 cohort. **9:** MS patients were randomly split into training ( $n=277$ ) and validation ( $n=132$ ) cohorts  
528 using stratified split to assure equal proportions of gender and MS types in both cohorts. **10:**  
529 Gradient boosting machine (GBM) algorithm was applied to the training cohort using  
530 confounder-adjusted (and unadjusted) MRI features as predictors to derive two sets of models for  
531 the four stated clinical outcomes. **11:** Models were further optimized in the training cohort using  
532 10-fold cross validation. **12:** Resulting eight models were applied to the independent validation  
533 cohort that did not contribute, in any way, to the generation or optimization of the models.

## Ventricular CSF Adjustment

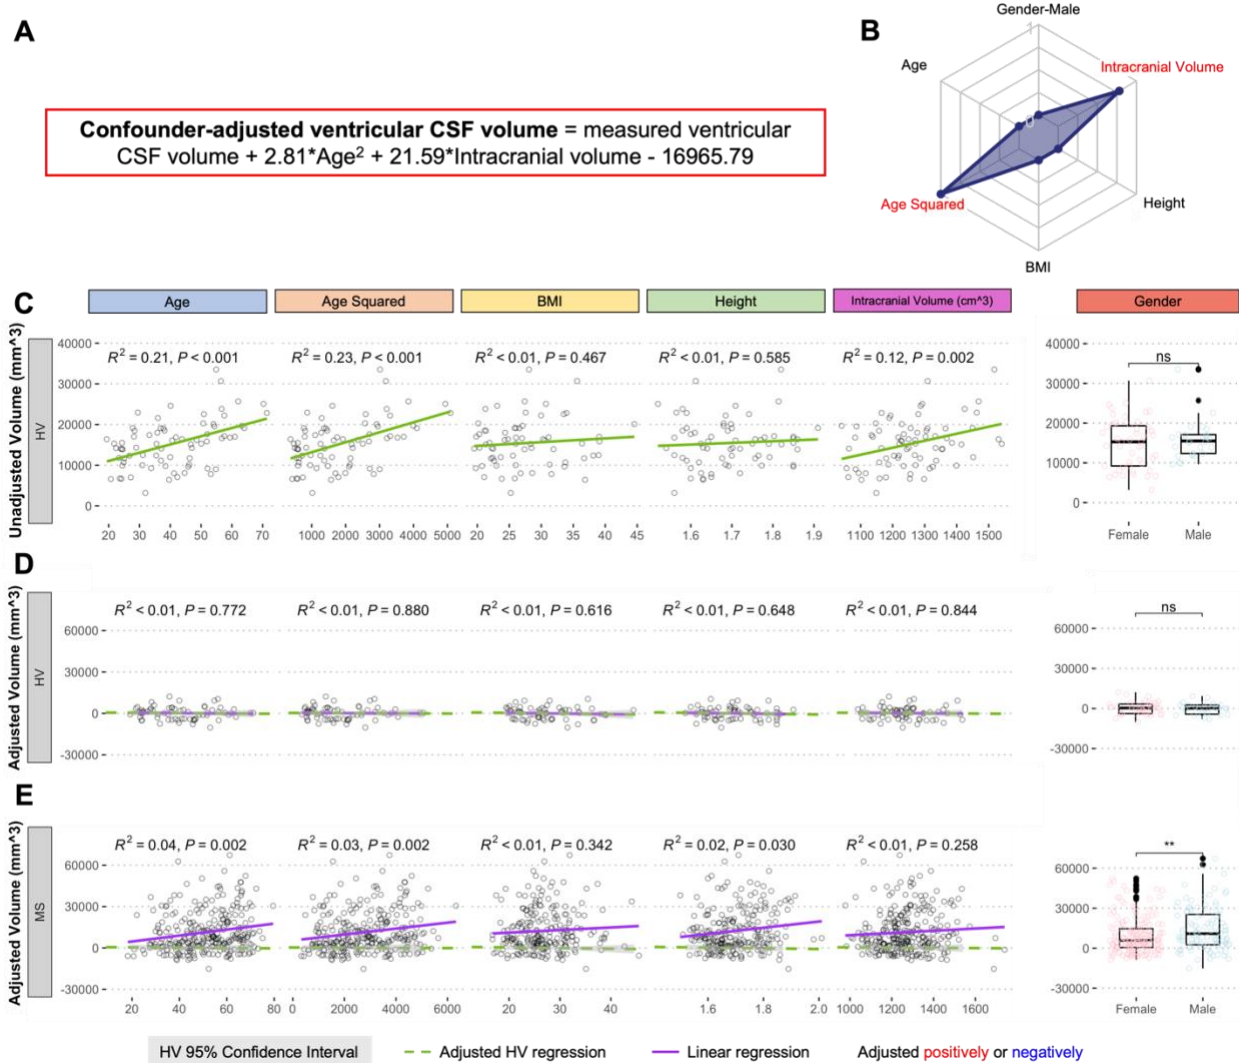

534

535 **Figure 2. Example of the adjustment of single MRI biomarker (i.e., ventricular CSF**

536 **volume) for six physiological confounders. A. The final equation for the confounder-adjusted**

537 **ventricular volume is shown at the top of the Figure in red outline. This equation was derived**

538 **from multiple linear regression models as described in the Method section. B. In the top right**

539 **corner is resulting radar chart that show proportional weights of the applied confounder**

540 **adjustment, with confounders with lowest weights (i.e., the innermost circle) representing zeros.**

541 **C. Univariate linear regression models between each tested confounder on x-axis (first 5 graphs)**

542 or gender (sixth graph) and measured ventricular volume on the y-axis in 80 healthy volunteers  
543 (HV). **D.** Same univariate regressions in the HV cohort after applying adjustment formula show  
544 no remaining effect of confounders. **E.** Applying HV-derived adjustment formula to MS cohort  
545 shows remaining significant residual effect of age, when considering Bonferroni adjustment for  
546 multiple comparisons (i.e.,  $p < 0.05/12 = p < 0.004$ ). Analogous Figures showing adjustment for all  
547 MRI features are in the Supplementary information.

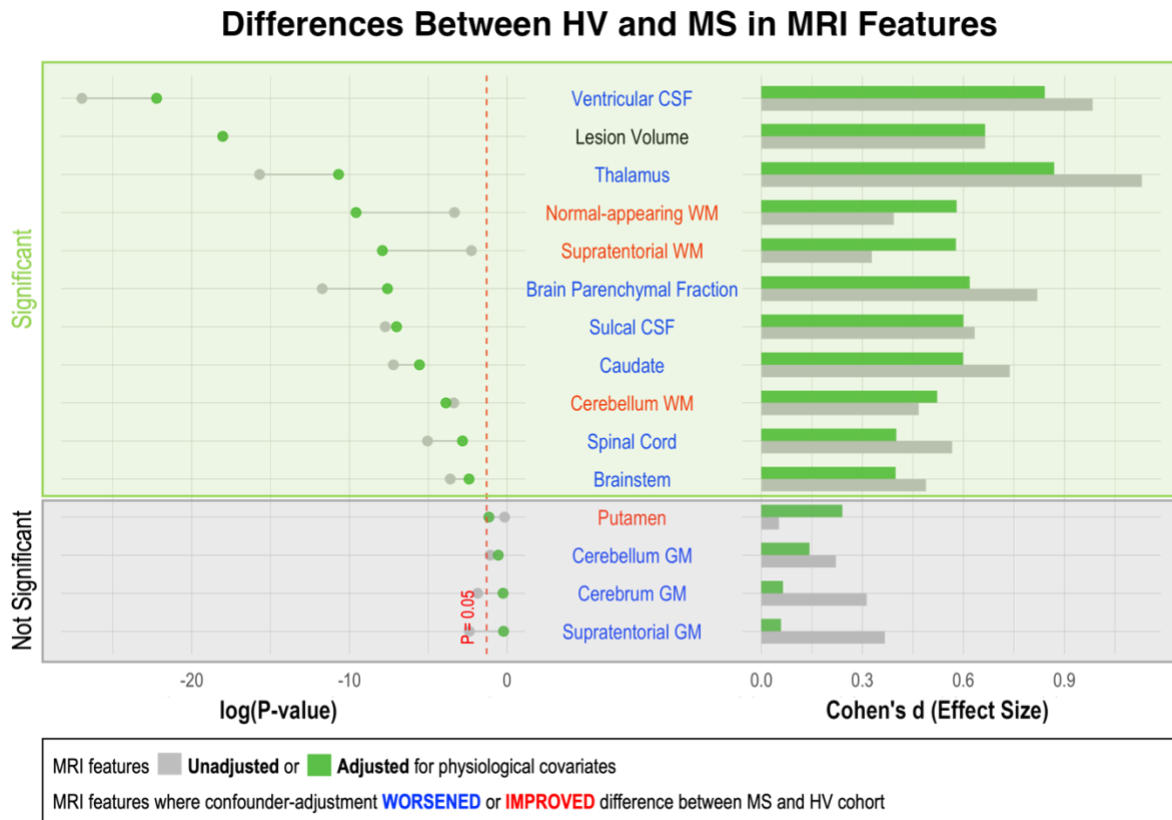

548

549 **Figure 3. Effect of adjustment for physiological confounders on measured differences in**  
 550 **MRI volumetric features between HV and MS patients.** Right side of the figure shows effect  
 551 sizes of unadjusted (gray bars) and confounder-adjusted (green bars) volumetric MRI features to  
 552 differentiate MS from HV. Effect sizes are shown as Standardized Main Difference (i.e.,  
 553 Cohen's d). Left side of the figure shows the effect of applied confounder adjustment with log p-  
 554 value. MRI features where confounder adjustment decreased the difference between MS and HV  
 555 are highlighted in blue, whereas those MRI features where confounder adjustment increased the  
 556 difference are highlighted in red. 11 out of 15 MRI features differentiated MS from HV with  
 557 statistical significance. The difference between MS and HV was partially driven by confounder  
 558 differences in majority of these MRI features (6/10). Thus, the applied adjustment decreased the  
 559 ability of these features to differentiate MS from HV. On the other hand, three measurements of

560 white matter volume (supratentorial WM, normal-appearing WM and cerebellum WM) enhanced  
561 their ability to differentiate MS from HV after confounder adjustment.

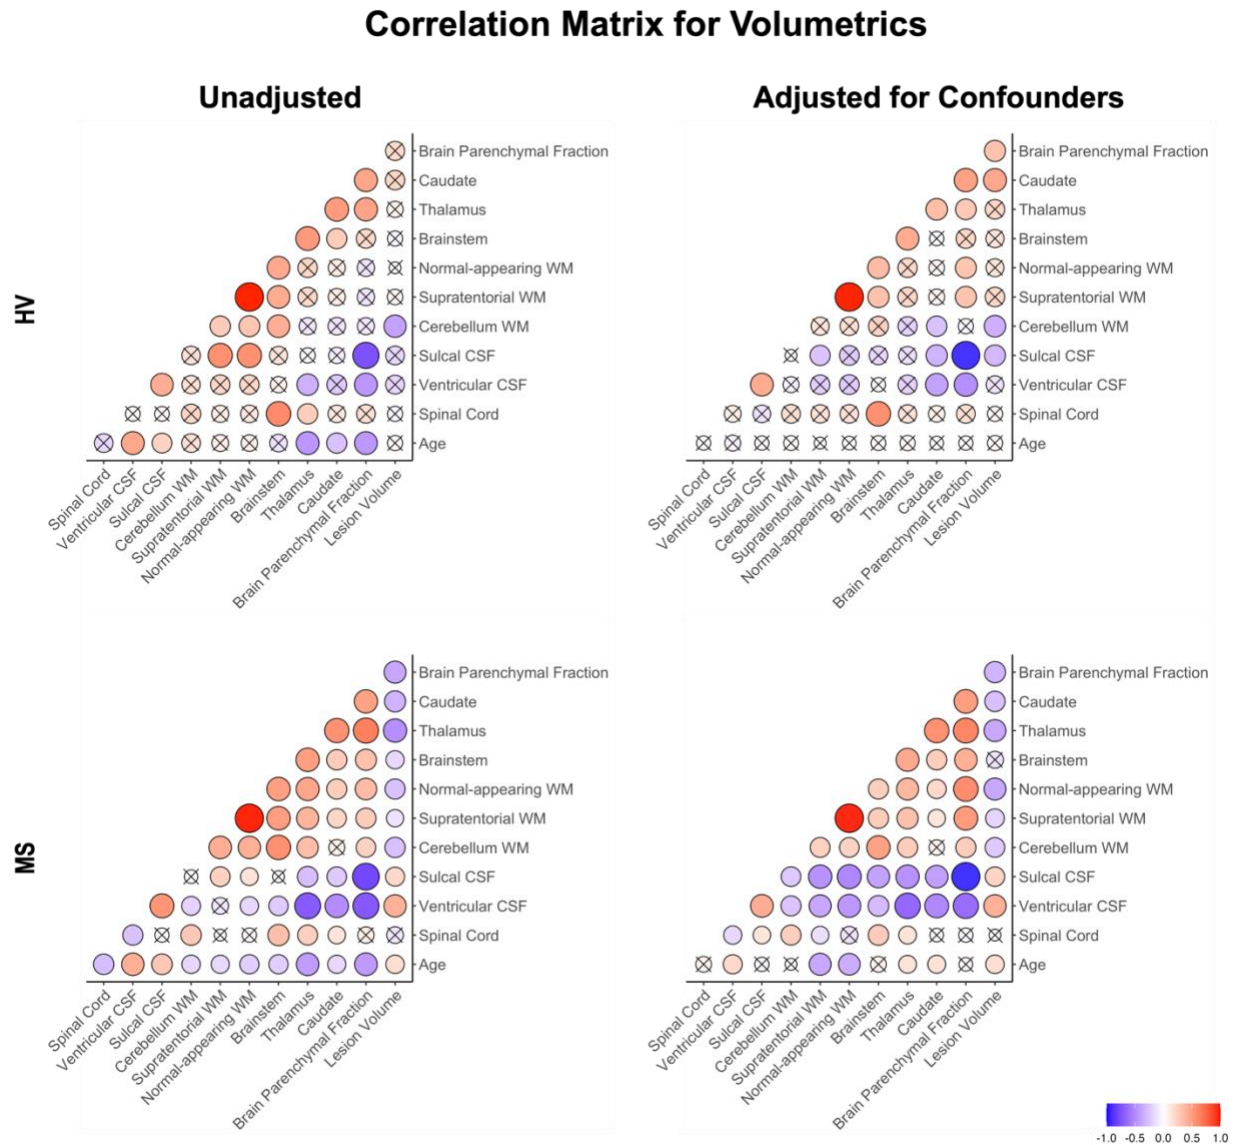

562

563 **Figure 4. Correlation matrix of unadjusted and confounder-adjusted MRI features.** The top  
 564 row shows correlations in HV cohort. Bottom row shows correlations in MS training cohort. Left  
 565 panel shows correlations of unadjusted MRI features. Right panel shows correlations of  
 566 confounder-adjusted MRI features. Correlations that are not statistically significant are marked  
 567 as (x), positive correlations are marked in red and negative in blue colors. The size of the circle  
 568 corresponds to Spearman's correlation coefficient. Confounder adjustment eliminated



569 correlations of MRI features with age, while it generally strengthened correlations of brain  
570 parenchymal fraction (BPFr) with remaining MRI features.



## Univariate Spearman Correlation Coefficients

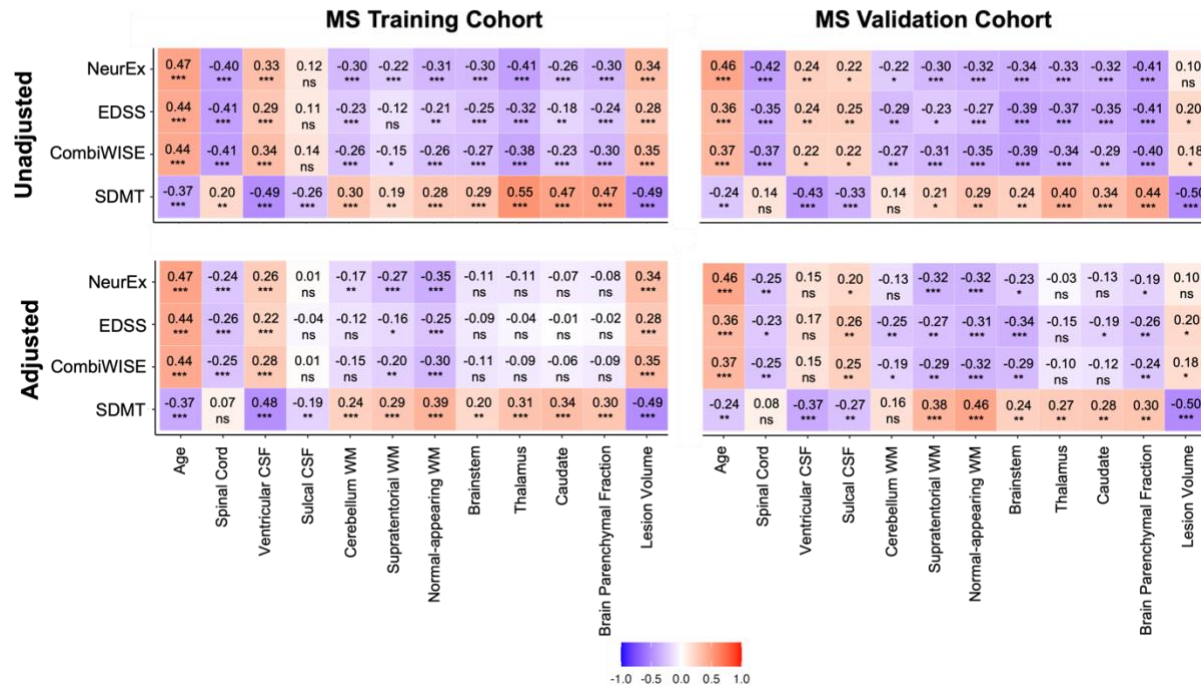

571

572 **Figure 5. Unilateral correlation matrix of unadjusted and confounder-adjusted MRI**  
 573 **features with disability outcomes.** The top row shows unilateral correlations of disability  
 574 outcomes with unadjusted MRI features. Left panel shows correlations of MS training cohort and  
 575 right panel shows correlations of MS validation cohort. Bottom row shows analogous  
 576 correlations with confounder-adjusted MRI features. Correlations that are not statistically  
 577 significant are marked as (ns). Positive correlations are marked in red and negative in blue  
 578 colors. Correlation p-values indicate statistical significance (\*P < 0.05, \*\*P < 0.01, and \*\*\*P <  
 579 0.001). Additional descriptive statistics are shown in Supplementary Table S1.

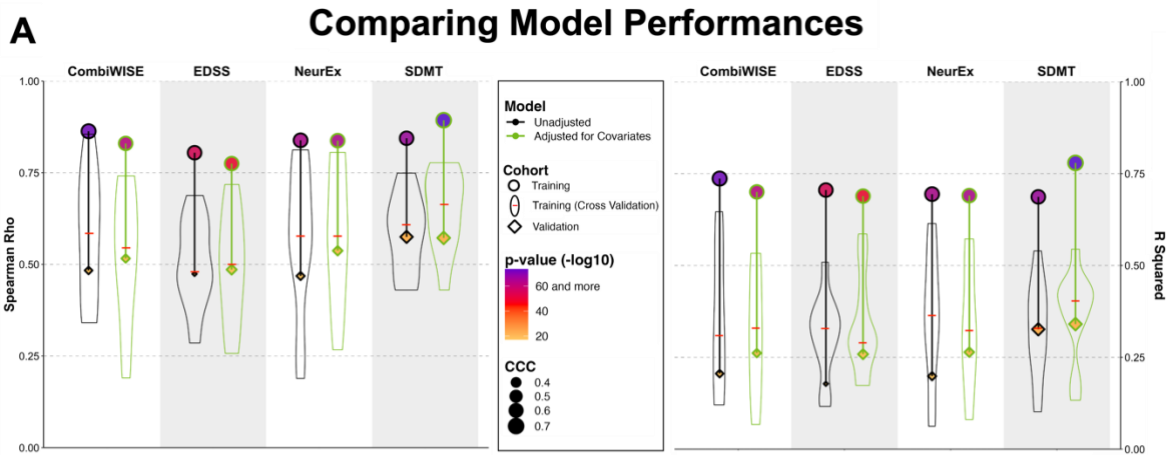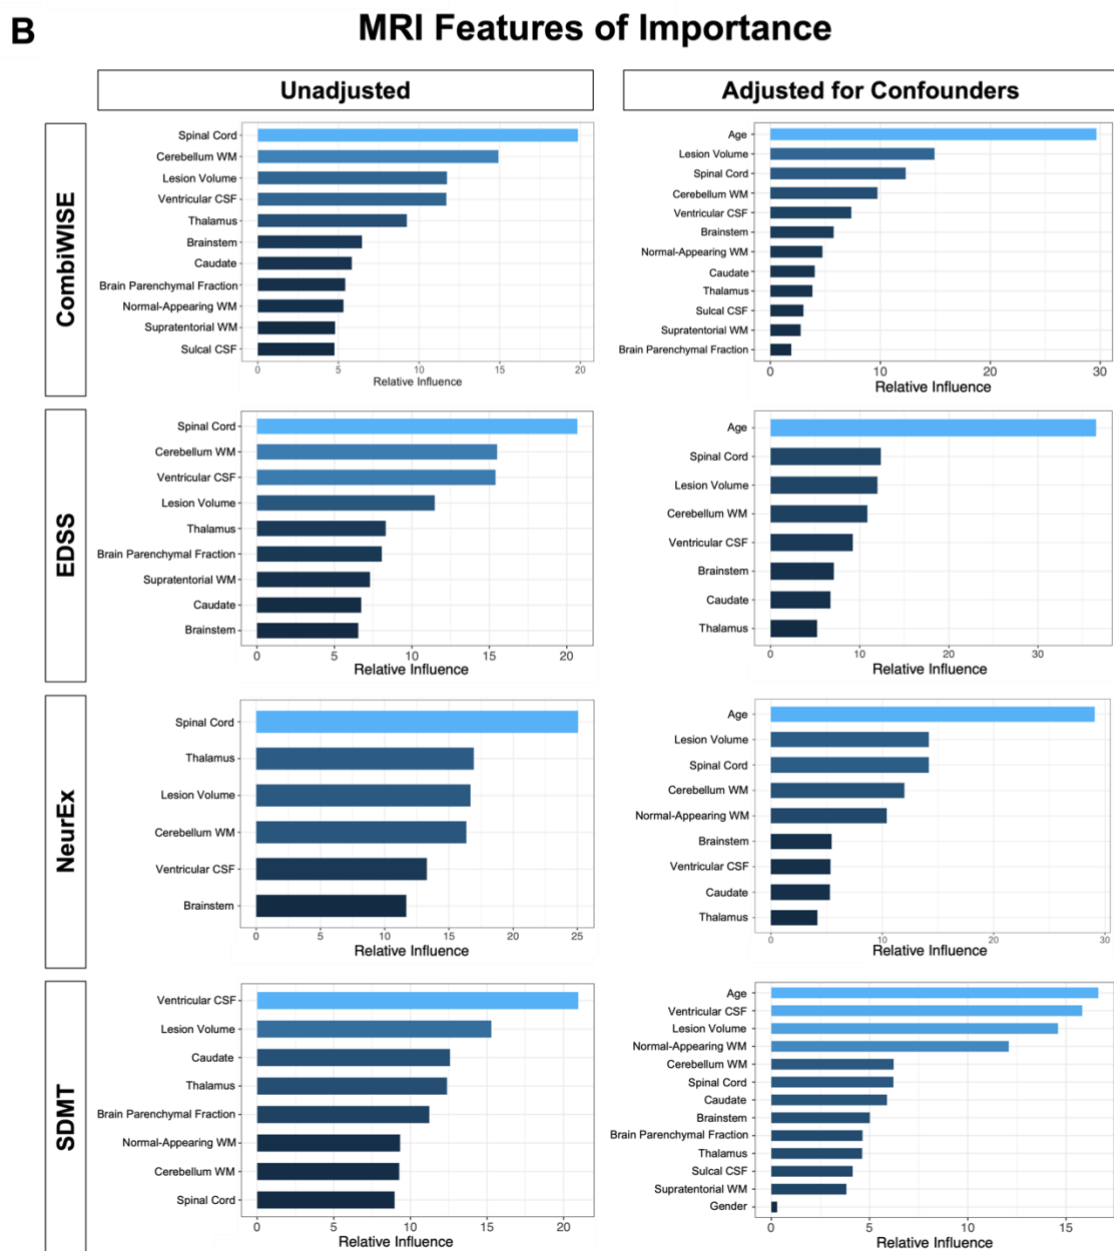

581 **Figure 6. Summary of model performances. A.** The left panel shows Spearman Rho  
582 correlation coefficients while right panel shows coefficient of determination ( $R^2$ ) for the same 8  
583 models. For each outcome (arranged in vertical columns), the unadjusted models are on the left  
584 side outlined in black, and the confounder-adjusted models are on the right side, outlined in  
585 green. The model performance in the training cohort is shown as circle; the distribution of cross-  
586 validation (i.e., re-using of the training cohort) results is shown as a violin plot with the median  
587 marked as a red horizontal line; the independent validation cohort performance is shown as  
588 diamond. The size of the symbols (i.e., circle and diamond) correspond to the Linh's  
589 concordance coefficient (CCC). Finally, the color of each symbol represents p-value ( $-\log_{10}$ )  
590 with lower p-values displayed in purple color and higher p-values in orange in accordance with  
591 the heatmap displayed in the figure legend. Unequivocal and robust decrease in model's  
592 performance is seen from training cohort to cross-validation to independent validation. Detailed  
593 statistics of the model performances are shown in Supplementary Table S2.

594 **B.** For each clinical outcome modelled (presented in rows) we show number of features selected  
595 in the final model(s) arranged in descending order of variable importance. The unadjusted  
596 models are displayed on the left, while confounder-adjusted models are displayed on the right.

597 **REFERENCES**

- 598 Amin, M., Ontaneda, D., 2021. Thalamic Injury and Cognition in Multiple Sclerosis. *Frontiers in*  
599 *Neurology* 11.
- 600 Barbour, C., Kosa, P., Varosanec, M., Greenwood, M., Bielekova, B., 2020. Molecular models  
601 of multiple sclerosis severity identify heterogeneity of pathogenic mechanisms. *medRxiv*,  
602 2020.2005.2018.20105932.
- 603 Benedict, R.H., DeLuca, J., Phillips, G., LaRocca, N., Hudson, L.D., Rudick, R., 2017. Validity  
604 of the Symbol Digit Modalities Test as a cognition performance outcome measure for multiple  
605 sclerosis. *Multiple Sclerosis Journal* 23, 721-733.
- 606 Boukhvalova, A.K., Fan, O., Weideman, A.M., Harris, T., Kowalczyk, E., Pham, L., Kosa, P.,  
607 Bielekova, B., 2019. Smartphone Level Test Measures Disability in Several Neurological  
608 Domains for Patients With Multiple Sclerosis. *Frontiers in Neurology* 10.
- 609 Button, K.S., Ioannidis, J.P., Mokrysz, C., Nosek, B.A., Flint, J., Robinson, E.S., Munafò, M.R.,  
610 2013. Power failure: why small sample size undermines the reliability of neuroscience. *Nat Rev*  
611 *Neurosci* 14, 365-376.
- 612 Cole, J.H., Raffel, J., Friede, T., Eshaghi, A., Brownlee, W.J., Chard, D., De Stefano, N.,  
613 Enzinger, C., Pirpamer, L., Filippi, M., Gasperini, C., Rocca, M.A., Rovira, A., Ruggieri, S.,  
614 Sastre-Garriga, J., Stromillo, M.L., Uitdehaag, B.M.J., Vrenken, H., Barkhof, F., Nicholas, R.,  
615 Ciccarelli, O., group, M.s., 2020. Longitudinal Assessment of Multiple Sclerosis with the Brain-  
616 Age Paradigm. *Ann Neurol* 88, 93-105.
- 617 Cole, J.H., Underwood, J., Caan, M.W., De Francesco, D., van Zoest, R.A., Leech, R., Wit,  
618 F.W., Portegies, P., Geurtsen, G.J., Schmand, B.A., Schim van der Loeff, M.F., Franceschi, C.,

619 Sabin, C.A., Majoie, C.B., Winston, A., Reiss, P., Sharp, D.J., collaboration, C., 2017. Increased  
620 brain-predicted aging in treated HIV disease. *Neurology* 88, 1349-1357.

621 Cordani, C., Hidalgo de la Cruz, M., Meani, A., Valsasina, P., Esposito, F., Pagani, E., Filippi,  
622 M., Rocca, M.A., 2021. MRI correlates of clinical disability and hand-motor performance in  
623 multiple sclerosis phenotypes. *Mult Scler* 27, 1205-1221.

624 De Leener, B., Lévy, S., Dupont, S.M., Fonov, V.S., Stikov, N., Louis Collins, D., Callot, V.,  
625 Cohen-Adad, J., 2017. SCT: Spinal Cord Toolbox, an open-source software for processing spinal  
626 cord MRI data. *NeuroImage* 145, 24-43.

627 Greenwell, B., Boehmke, B., Cunningham, J., Developers, G., 2020. gbm: Generalized Boosted  
628 Regression Models.

629 Hemond, C.C., Bakshi, R., 2018. Magnetic Resonance Imaging in Multiple Sclerosis. *Cold*  
630 *Spring Harbor perspectives in medicine* 8, a028969.

631 Ioannidis, J.P., 2005. Why most published research findings are false. *PLoS Med* 2, e124.

632 Ioannidis, J.P., 2008. Why most discovered true associations are inflated. *Epidemiology* 19, 640-  
633 648.

634 Jacobs, S.A.H., Muraro, P.A., Cencioni, M.T., Knowles, S., Cole, J.H., Nicholas, R., 2021.  
635 Worse Physical Disability Is Associated With the Expression of PD-1 on Inflammatory T-Cells  
636 in Multiple Sclerosis Patients With Older Appearing Brains. *Front Neurol* 12, 801097.

637 Jakimovski, D., Zivadinov, R., Weinstock-Guttman, B., Bergsland, N., Dwyer, M.G., Lagana,  
638 M.M., 2020. Longitudinal analysis of cerebral aqueduct flow measures: multiple sclerosis flow  
639 changes driven by brain atrophy. *Fluids and barriers of the CNS* 17, 9-9.

640 Kassambara, A., 2021. rstatix: Pipe-Friendly Framework for Basic Statistical Tests.

641 Kosa, P., Barbour, C., Wichman, A., Sandford, M., Greenwood, M., Bielekova, B., 2018.  
642 NeurEx: digitalized neurological examination offers a novel high-resolution disability scale.  
643 *Annals of Clinical and Translational Neurology* 5, 1241-1249.  
644 Kurtzke, J.F., 1983. Rating neurologic impairment in multiple sclerosis. An expanded disability  
645 status scale (EDSS) 33, 1444-1444.  
646 Liu, J., Kelly, E., Bielekova, B., 2022. Current status and future opportunities in modeling  
647 Multiple Sclerosis clinical characteristics. medRxiv, 2022.2002.2024.22271474.  
648 Masvekar, R., Phillips, J., Komori, M., Wu, T., Bielekova, B., 2021. Cerebrospinal Fluid  
649 Biomarkers of Myeloid and Glial Cell Activation Are Correlated With Multiple Sclerosis  
650 Lesional Inflammatory Activity. *Frontiers in Neuroscience* 15.  
651 Messan, K.S., Pham, L., Harris, T., Kim, Y., Morgan, V., Kosa, P., Bielekova, B., 2022.  
652 Assessment of Smartphone-Based Spiral Tracing in Multiple Sclerosis Reveals Intra-Individual  
653 Reproducibility as a Major Determinant of the Clinical Utility of the Digital Test. *Frontiers in*  
654 *Medical Technology* 3.  
655 Ontaneda, D., Sati, P., Raza, P., Kilbane, M., Gombos, E., Alvarez, E., Azevedo, C., Calabresi,  
656 P., Cohen, J.A., Freeman, L., Henry, R.G., Longbrake, E.E., Mitra, N., Illenberger, N., Schindler,  
657 M., Moreno-Dominguez, D., Ramos, M., Mowry, E., Oh, J., Rodrigues, P., Chahin, S., Kaisey,  
658 M., Waubant, E., Cutter, G., Shinohara, R., Reich, D.S., Solomon, A., Sicotte, N.L., 2021.  
659 Central vein sign: A diagnostic biomarker in multiple sclerosis (CAVS-MS) study protocol for a  
660 prospective multicenter trial. *NeuroImage: Clinical* 32, 102834.  
661 Pham, L., Harris, T., Varosanec, M., Morgan, V., Kosa, P., Bielekova, B., 2021. Smartphone-  
662 based symbol-digit modalities test reliably captures brain damage in multiple sclerosis. *npj*  
663 *Digital Medicine* 4, 36.

664 Potvin, O., Mouiha, A., Dieumegarde, L., Duchesne, S., Alzheimer's Disease Neuroimaging, I.,  
665 2016. Normative data for subcortical regional volumes over the lifetime of the adult human  
666 brain. *Neuroimage* 137, 9-20.

667 Rocca, M.A., Battaglini, M., Benedict, R.H.B., De Stefano, N., Geurts, J.J.G., Henry, R.G.,  
668 Horsfield, M.A., Jenkinson, M., Pagani, E., Filippi, M., 2017. Brain MRI atrophy quantification  
669 in MS: From methods to clinical application. *Neurology* 88, 403-413.

670 Shiee, N., Bazin, P.-L., Ozturk, A., Reich, D.S., Calabresi, P.A., Pham, D.L., 2010. A topology-  
671 preserving approach to the segmentation of brain images with multiple sclerosis lesions.  
672 *NeuroImage* 49, 1524-1535.

673 Signorell, A., Aho, K., Alfons, A., Anderegg, N., Aragon, T., Arachchige, C., Arppe, A.,  
674 Baddeley, A., Barton, K., Bolker, B., Borchers, H.W., Caeiro, F., Champely, S., Chessel, D.,  
675 Chhay, L., Cooper, N., Cummins, C., 2021. DescTools: Tools for Descriptive Statistics.

676 Simpson-Yap, S., De Brouwer, E., Kalincik, T., Rijke, N., Hillert, J.A., Walton, C., Edan, G.,  
677 Moreau, Y., Spelman, T., Geys, L., Parciak, T., Gautrais, C., Lazovski, N., Pirmani, A.,  
678 Ardeshirdavanai, A., Forsberg, L., Glaser, A., McBurney, R., Schmidt, H., Bergmann, A.B.,  
679 Braune, S., Stahmann, A., Middleton, R., Salter, A., Fox, R.J., van der Walt, A., Butzkueven, H.,  
680 Alroughani, R., Ozakbas, S., Rojas, J.I., van der Mei, I., Nag, N., Ivanov, R., Sciascia do Olival,  
681 G., Dias, A.E., Magyari, M., Brum, D., Mendes, M.F., Alonso, R.N., Nicholas, R.S., Bauer, J.,  
682 Chertcoff, A.S., Zabalza, A., Arrambide, G., Fidaio, A., Comi, G., Peeters, L., 2021. Associations  
683 of Disease-Modifying Therapies With COVID-19 Severity in Multiple Sclerosis. *Neurology* 97,  
684 e1870-e1885.

685 Team, R., 2015. RStudio: Integrated Development for R. RStudio, Inc.

686 Team, R.C., 1969. stats package RDocumentation.

687 Team, R.C., 2021. R: A Language and Environment for Statistical Computing. R Foundation for  
688 Statistical Computing, <https://www.R-project.org/>, Vienna, Austria.

689 Weideman, A.M., Barbour, C., Tapia-Maltos, M.A., Tran, T., Jackson, K., Kosa, P., Komori, M.,  
690 Wichman, A., Johnson, K., Greenwood, M., Bielekova, B., 2017a. New Multiple Sclerosis  
691 Disease Severity Scale Predicts Future Accumulation of Disability. *Frontiers in Neurology* 8.

692 Weideman, A.M., Tapia-Maltos, M.A., Johnson, K., Greenwood, M., Bielekova, B., 2017b.  
693 Meta-analysis of the Age-Dependent Efficacy of Multiple Sclerosis Treatments. *Front Neurol* 8,  
694 577.

695 Zeydan, B., Kantarci, O.H., 2020. Impact of Age on Multiple Sclerosis Disease Activity and  
696 Progression. *Curr Neurol Neurosci Rep* 20, 24.

697
